# Supplementary material for: Catalytically Active Snake Venom PLA2 Enzymes: An Overview of Its Elusive Mechanisms of Reaction: Miniperspective
Source: PubMed Central journal article supplement (PMC10150362; doi:10.1021/acs.jmedchem.3c00097), 2023-04-05
Supplement: jm3c00097_si_001.pdf [file jm3c00097_si_001.pdf]

# Supporting Information

## Catalytically Active Snake Venom PLA<sub>2</sub> enzymes: An Overview of Its Elusive Mechanisms of Reaction

Juliana Castro-Amorim,<sup>1</sup> Ana Novo de Oliveira,<sup>1</sup> Saulo Luís Da Silva,<sup>1</sup> Andreimar M. Soares,<sup>2,3</sup>  
Ashis K. Mukherjee,<sup>4,5</sup> Maria João Ramos,<sup>1</sup> and Pedro A. Fernandes<sup>1\*</sup>

<sup>1</sup> LAQV, REQUIMTE, Departamento de Química e Bioquímica, Faculdade de Ciências, Universidade do Porto, Rua do Campo Alegre, s/n, 4169-007 Porto, Portugal

<sup>2</sup> Laboratory of Biotechnology of Proteins and Bioactive Compounds (LABIOPROT), Oswaldo Cruz Foundation, National Institute of Epidemiology in the Western Amazon (INCT-EpiAmO), Porto Velho, Rondônia 76812-245, Brazil

<sup>3</sup> Sao Lucas University Center (UniSL), Porto Velho, Rondônia 76805-846, Brazil

<sup>4</sup> Microbial Biotechnology and Protein Research Laboratory, Department of Molecular Biology and Biotechnology, Tezpur University, Tezpur 784028, Assam, India

<sup>5</sup> Division of Life Sciences, Institute of Advanced Studies in Science and Technology, Vigyan Path, Garchuk, Paschim Boragaon, Guwahati 781035, Assam, India

Email: [pafernan@fc.up.pt](mailto:pafernan@fc.up.pt)

---

### Contents of SI file

**Table S1.** The sequence identity matrix of six different sPLA<sub>2</sub> resulted from the multiple sequence alignment of a human synovial (UniProtKB AC: P14555), bovine pancreatic (UniProtKB AC: P00593), *B. asper* (UniProtKB AC: P20474), *E. carinatus* (UniProtKB AC: Q7T3S7), *N. atra* (UniProtKB AC: P00598) and *N. sputatrix* (UniProtKB AC: Q92085). Percent sequence identity matrix was created by ClustalW. <sup>1</sup> Higher percentages are represented with darker colors.

| Synovial (GIIA) | Pancreatic (GIB) | <i>B. asper</i> (GIIA) | <i>E. carinatus</i> (GIIA) | <i>N. atra</i> (GIA) | <i>N. sputatrix</i> (GIA) |                     |
|-----------------|------------------|------------------------|----------------------------|----------------------|---------------------------|---------------------|
| 100             | 37               | 45                     | 47                         | 35                   | 33                        | Synovial            |
|                 | 100              | 36                     | 35                         | 54                   | 52                        | Pancreatic          |
|                 |                  | 100                    | 52                         | 33                   | 32                        | <i>B. asper</i>     |
|                 |                  |                        | 100                        | 35                   | 33                        | <i>E. carinatus</i> |
|                 |                  |                        |                            | 100                  | 95                        | <i>N. atra</i>      |
|                 |                  |                        |                            |                      | 100                       | <i>N. sputatrix</i> |

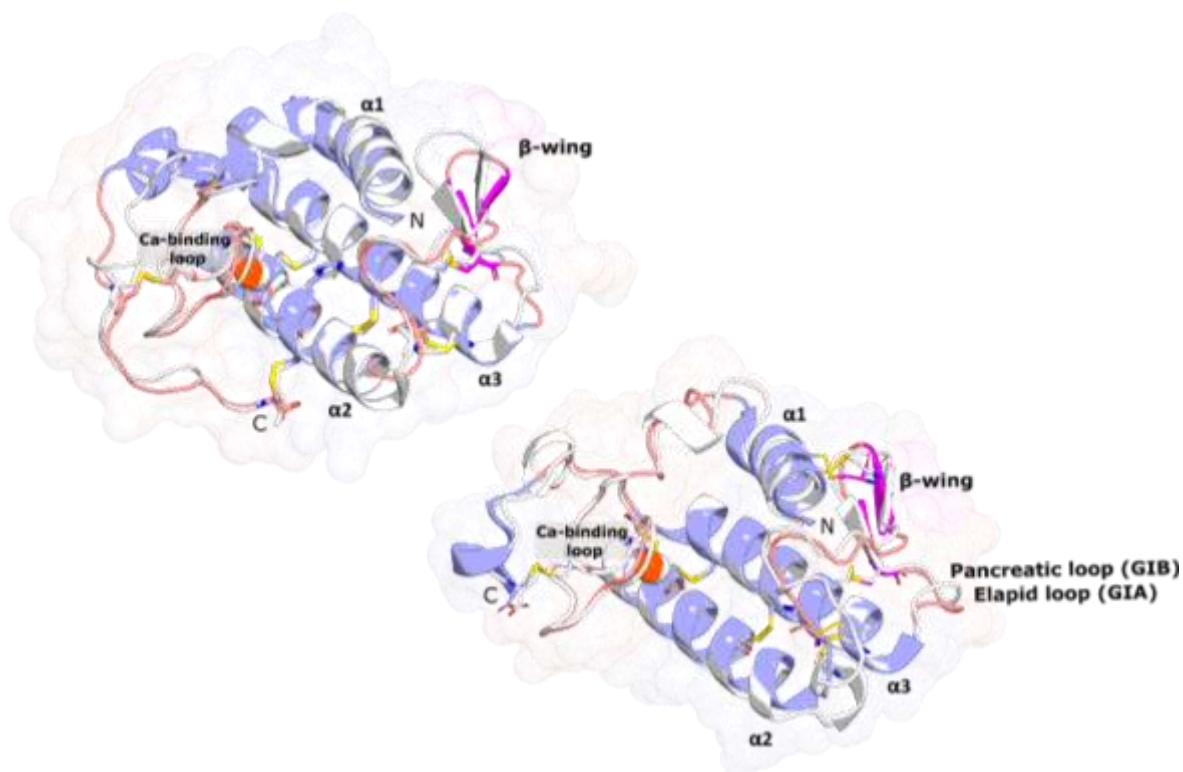

**Figure S1.** Cartoon representation of PLA<sub>2</sub> tertiary structure. (left) Superimposition of a bovine pancreatic (PDB 1MKV) (white) and snake venom GI-PLA<sub>2</sub> from the Chinese cobra (*Naja atra*) (PDB 1POA); (right) Superimposition of a human synovial (white) (PDB 1POE) and snake venom GII-PLA<sub>2</sub> from the Indian saw-scaled viper (*Echis carinatus*) (PDB 1OZ6). All PLA<sub>2</sub> have highly similar tertiary structures: Helices (lightblue), loops (salmon) and  $\beta$ -sheets (magenta) cartoon. The Ca<sup>2+</sup> is show as an orange sphere and the disulfide bonds as yellow lines. The Ca<sup>2+</sup>-binding loop, the N- and C-terminal are also identified. The PyMOL molecular graphics software package was used to generate the representations.

**Table S2.** A selection of the reported X-ray crystallographic structures of snake venom, human, porcine and bovine GI/GII PLA<sub>2</sub>.

| Group | Source               | Species                | PDB  | Ligands | Resolution | Ref. |
|-------|----------------------|------------------------|------|---------|------------|------|
| GIA   | Elapid snake venom   | <i>Naja atra</i>       | 1POB | holo    | 2.00 Å     | 2    |
| GIA   | Elapid snake venom   | <i>Naja atra</i>       | 1POA | apo     | 1.50 Å     | 3    |
| GIB   | Bovine pancreas      | <i>Bos taurus</i>      | 1BP2 | apo     | 1.70 Å     | 4    |
| GIB   | Bovine pancreas      | <i>Bos taurus</i>      | 1MKV | holo    | 1.89 Å     | 5    |
| GIB   | Porcine pancreas     | <i>Sus scrofa</i>      | 5P2P | holo    | 2.40 Å     | 6    |
| GIIA  | Human synovial fluid | <i>Homo sapiens</i>    | 1KVO | holo    | 2.00 Å     | 7    |
| GIIA  | Human synovial fluid | <i>Homo sapiens</i>    | 1POE | holo    | 2.10 Å     | 8    |
| GIIA  | Viperid snake venom  | <i>Crotalus atrox</i>  | 1PP2 | apo     | 2.50 Å     | 9    |
| GIIA  | Viperid snake venom  | <i>Bothrops asper</i>  | 5TFV | apo     | 2.54 Å     | 10   |
| GIIA  | Viperid snake venom  | <i>Gloydius halys</i>  | 1PSJ | apo     | 2.00 Å     | 11   |
| GIIA  | Viperid snake venom  | <i>Echis carinatus</i> | 1OZ6 | apo     | 2.60 Å     | 12   |

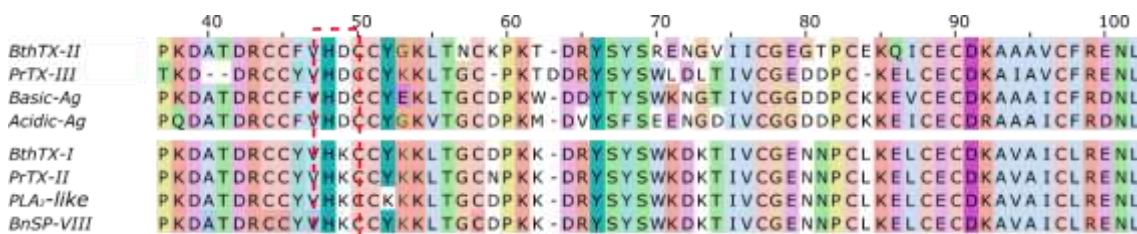

**Figure S2.** Sequence alignment of four classic PLA<sub>2</sub> (BthTX-II, PrTX-III, Basic-PLA<sub>2</sub> and Acidic-PLA<sub>2</sub> - UniProtKB ACs: P45881, P58464, O42187 and P14418, respectively) and four PLA<sub>2</sub>-like proteins (BthTX-I, PrTX-II, PLA<sub>2</sub>-like and BnSP-VIII - UniProtKB AC: Q90249, P82287, I6L8L6 and Q9IAT9, respectively). The replacement of the Asp residue by a Lysine at position 49 is highlighted in a red dashed box. High sequence identity is also evidenced. Amino acids are colored according to the ClustalX color scheme: hydrophobic (blue), positive charge (red), negative charge (magenta), polar (green), cysteines (pink), glycines (orange), prolines (yellow), aromatic (cyan) and unconserved (white). Created with Jalview 2.11 software.<sup>13</sup>

## References

- (1) Thomopson, J.; Higgins, D. G.; Gibson, T. J. ClustalW. *Nucleic Acids Res* **1994**, *22*, 4673-4680.
- (2) White, S. P.; Scott, D. L.; Otwinowski, Z.; Gelb, M. H.; Sigler, P. B. Crystal structure of cobra-venom phospholipase A2 in a complex with a transition-state analogue. *Science* **1990**, *250* (4987), 1560-1563. <https://doi.org/10.1126/science.2274787>.
- (3) Scott, D. L.; White, S. P.; Otwinowski, Z.; Yuan, W.; Gelb, M. H.; Sigler, P. B. Interfacial catalysis: the mechanism of phospholipase A2. *Science* **1990**, *250* (4987), 1541-1546. <https://doi.org/10.1126/science.2274785>.
- (4) Dijkstra, B. W.; Kalk, K. H.; Hol, W. G. J.; Drenth, J. Structure of bovine pancreatic phospholipase A2 at 1.7 Å resolution. *J. Mol. Biol.* **1981**, *147* (1), 97-123. DOI: [https://doi.org/10.1016/0022-2836\(81\)90081-4](https://doi.org/10.1016/0022-2836(81)90081-4).
- (5) Sekar, K.; Kumar, A.; Liu, X.; Tsai, M. D.; Gelb, M. H.; Sundaralingam, M. Structure of the complex of bovine pancreatic phospholipase A2 with a transition-state analogue. *Acta Crystallogr. D Biol. Crystallogr.* **1998**, *54* (Pt 3), 334-341. <https://doi.org/10.1107/s090744499701247x>.
- (6) Thunnissen, M. M. G. M.; Ab, E.; Kalk, K. H.; Drenth, J.; Dijkstra, B. W.; Kuipers, O. P.; Dijkman, R.; de Haas, G. H.; Verheij, H. M. X-ray structure of phospholipase A2 complexed with a substrate-derived inhibitor. *Nature* **1990**, *347* (6294), 689-691. <https://doi.org/10.1038/347689a0>.
- (7) Cha, S.-S.; Lee, D.; Adams, J.; Kurdyla, J. T.; Jones, C. S.; Marshall, L. A.; Bolognese, B.; Abdel-Meguid, S. S.; Oh, B.-H. High-resolution X-ray crystallography reveals precise binding interactions between human nonpancreatic secreted phospholipase A2 and a highly potent inhibitor (FPL67047XX). *J. Med. Chem.* **1996**, *39* (20), 3878-3881. <https://doi.org/10.1021/jm960502g>.
- (8) Scott, D. L.; White, S. P.; Browning, J. L.; Rosa, J. J.; Gelb, M. H.; Sigler, P. B. Structures of free and inhibited human secretory phospholipase A2 from inflammatory exudate. *Science* **1991**, *254* (5034), 1007-1010. <https://doi.org/10.1126/science.1948070>.
- (9) Brunie, S.; Bolin, J.; Gewirth, D.; Sigler, P. B. The refined crystal structure of dimeric phospholipase A2 at 2.5 Å. Access to a shielded catalytic center. *J. Biol. Chem.* **1985**, *260* (17), 9742-9749.
- (10) Salvador, G. H. M.; dos Santos, J. I.; Lomonte, B.; Fontes, M. R. M. Crystal structure of a phospholipase A2 from Bothrops asper venom: Insights into a new putative “myotoxic cluster”. *Biochimie* **2017**, *133*, 95-102. DOI: <https://doi.org/10.1016/j.biochi.2016.12.015>.
- (11) Wang, X.-q.; Yang, J.; Gui, L.-l.; Lin, Z.-j.; Chen, Y.-c.; Zhou, Y.-c. Crystal Structure of an Acidic Phospholipase A2 from the Venom of Agkistrodon halyspallas at 2.0 Å Resolution. *J. Mol. Biol.* **1996**, *255* (5), 669-676. DOI: <https://doi.org/10.1006/jmbi.1996.0054>.
- (12) Jasti, J.; Paramasivam, M.; Srinivasan, A.; Singh, T. P. Structure of an acidic phospholipase A2 from Indian saw-scaled viper (*Echis carinatus*) at 2.6 Å resolution reveals a novel intermolecular interaction. *Acta Crystallogr. D Biol. Crystallogr.* **2004**, *60* (Pt 1), 66-72. <https://doi.org/10.1107/s090744490302208x>.
- (13) Waterhouse, A. M.; Procter, J. B.; Martin, D. M.; Clamp, M.; Barton, G. J. Jalview Version 2—a multiple sequence alignment editor and analysis workbench. *Bioinformatics* **2009**, *25* (9), 1189-1191. <https://doi.org/10.1093/bioinformatics/btp033>.
